# Supplementary material for: Remote-sensing estimate of glacier mass balance over the central Nyainqentanglha Range during 1968 – ∼ 2013
Source: Copernicus journal article supplement (doi:10.5194/tc-2018-90), 2018-05-30
Supplement: Supplementary file [file tc-2018-90-AC3-supplement.zip]

Supplementary Figures

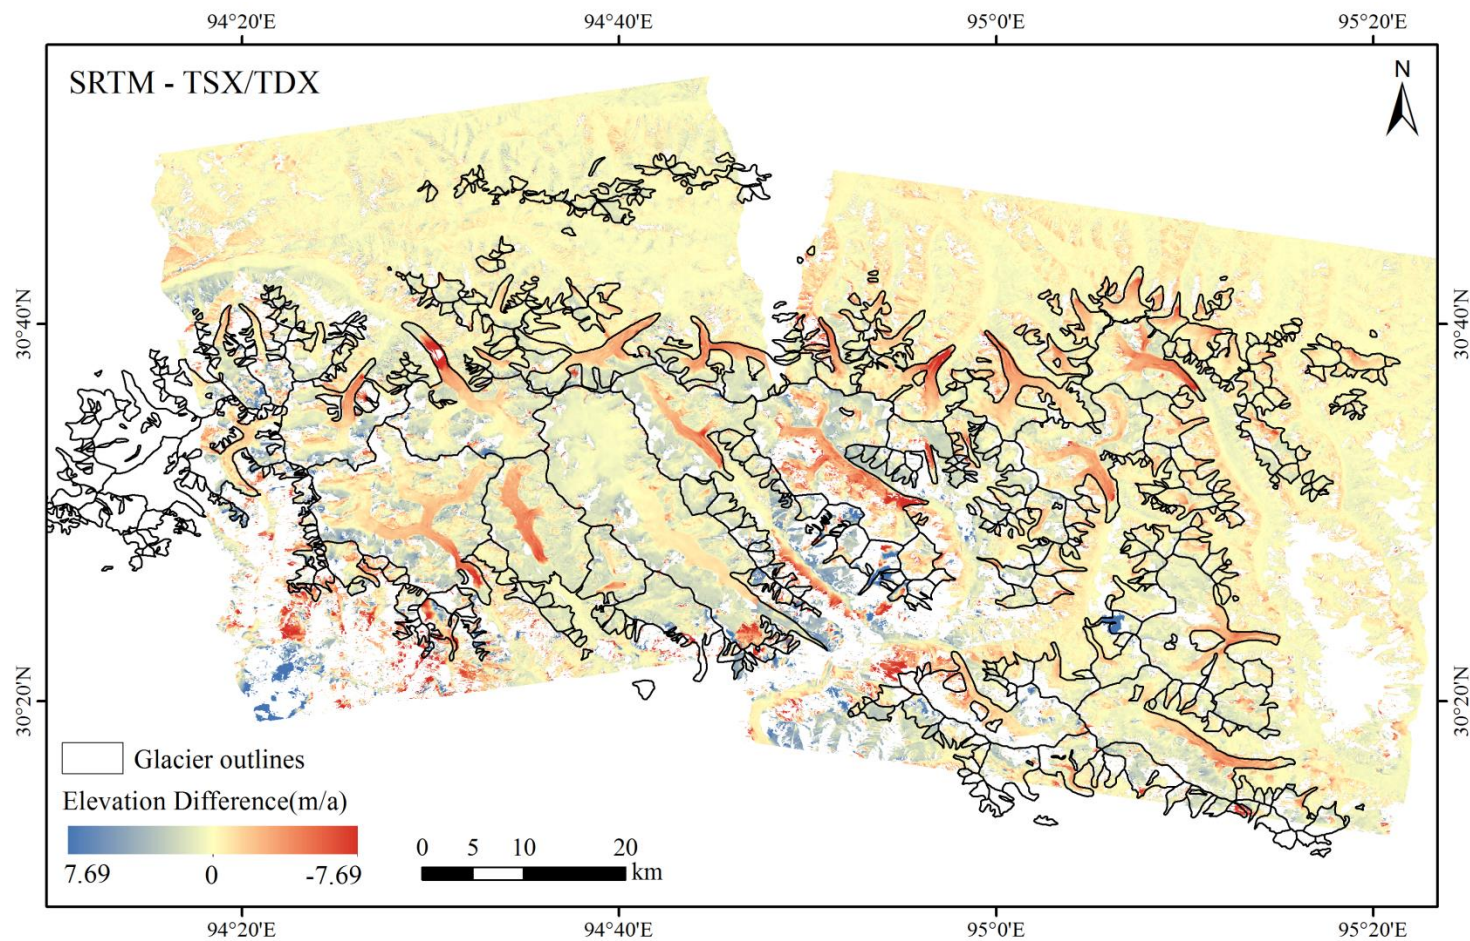

Supplementary Figure S1 Elevation changes of glacier area and off-glacier area in the CNR from 2000 to ~2013. The glacier outlines are based on the geometric union of the 1968 and 2016 glacier extents.

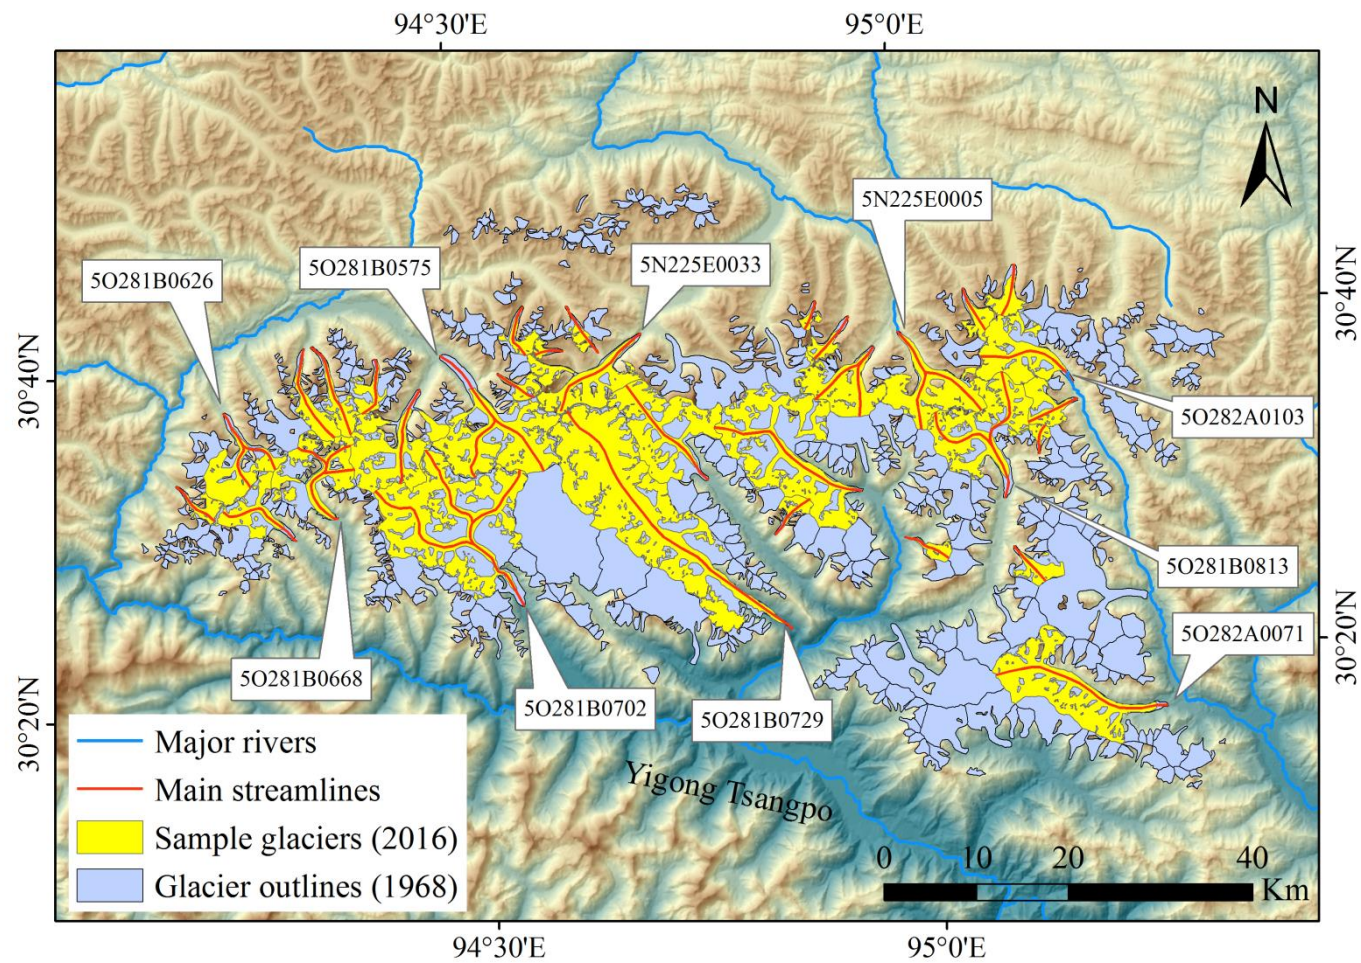

Supplementary Figure S2 The 33 sample glaciers selected for the generation of centrelines and calculation of length change.



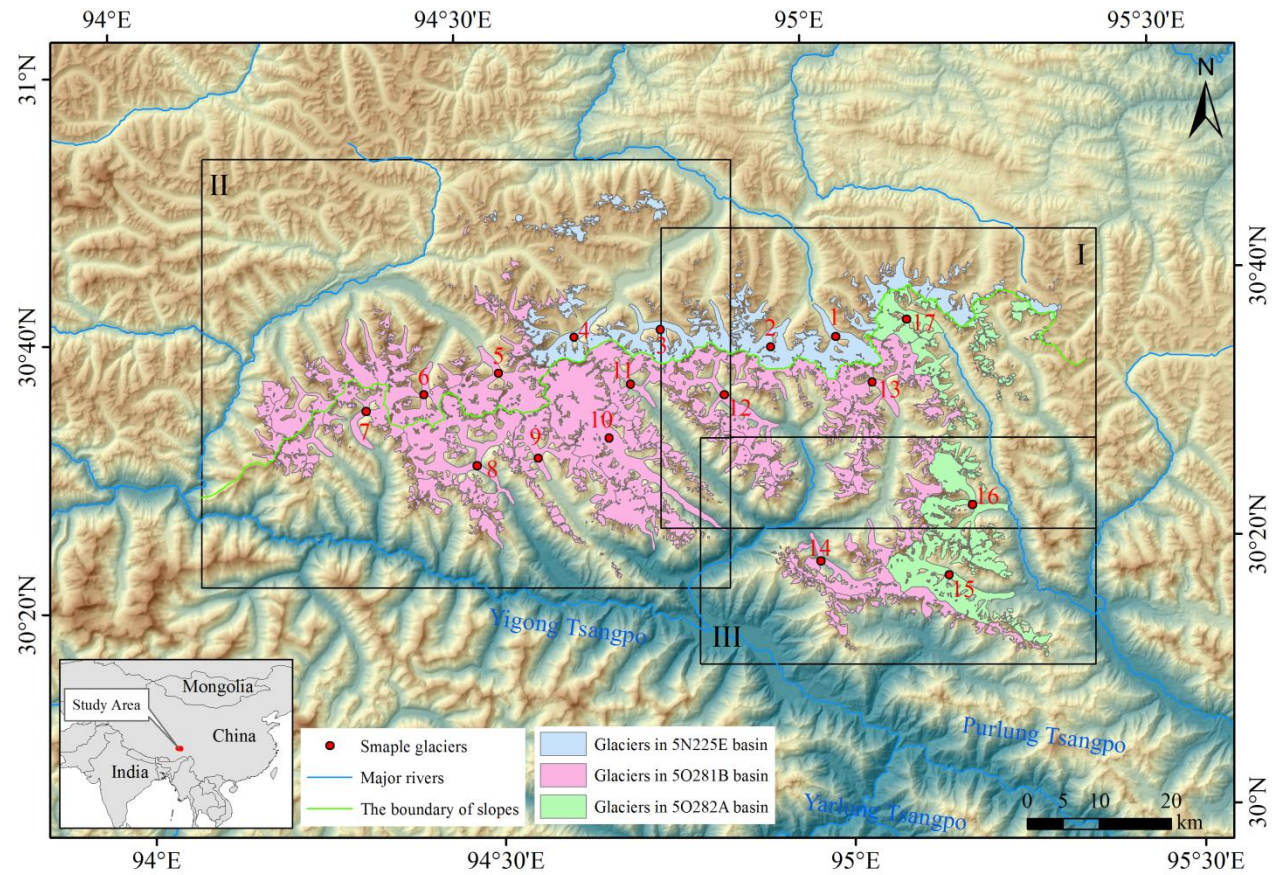

Supplementary Figure S3 Glacier distribution in different drainage basins. Numbers indicate specific sample glaciers chosen for analysis. In order to detect more details in elevation change maps, glaciers in study area are divided into three regions. More details of elevation change were showed in Supplementary Figures S4-S6.

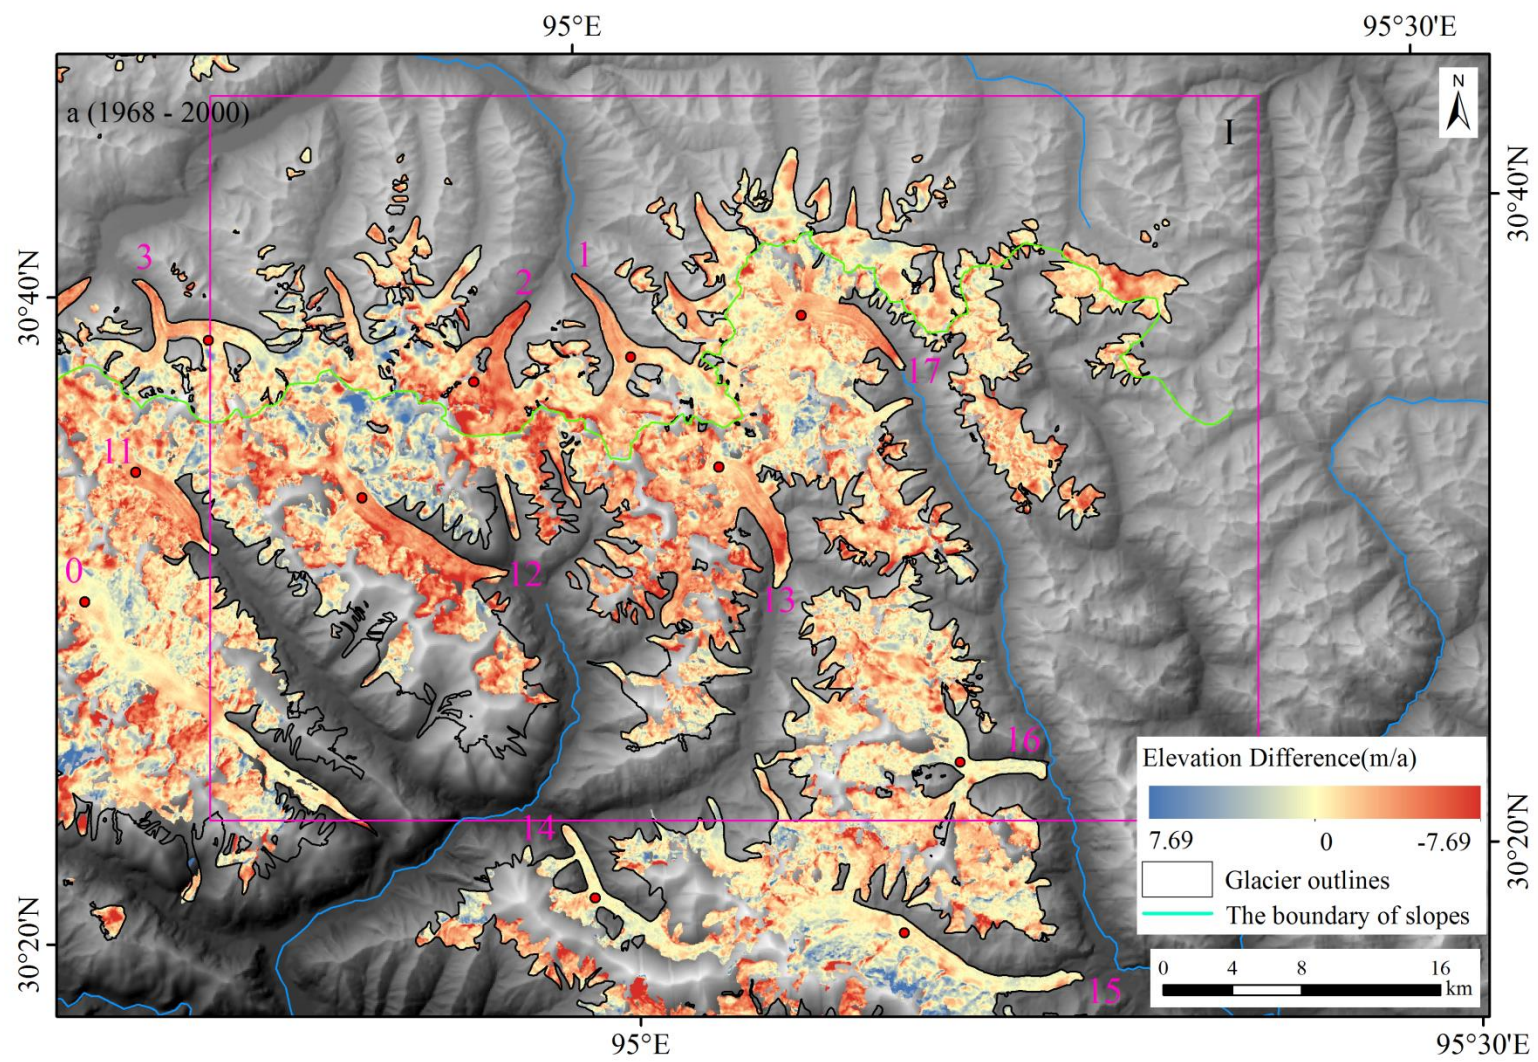



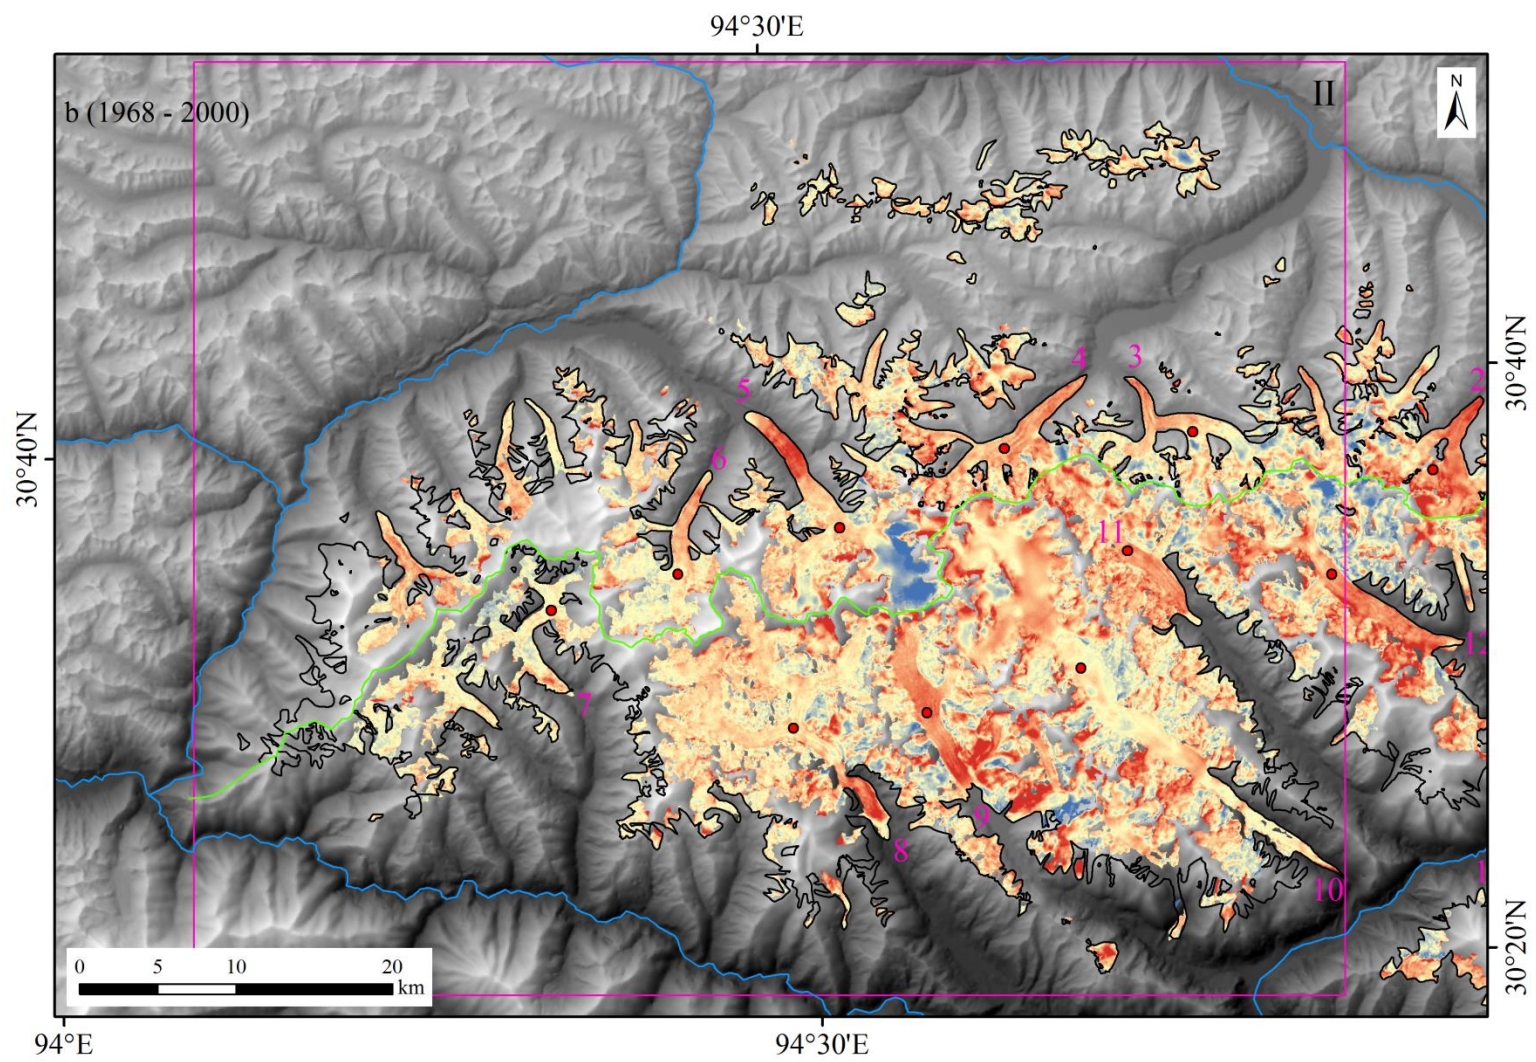

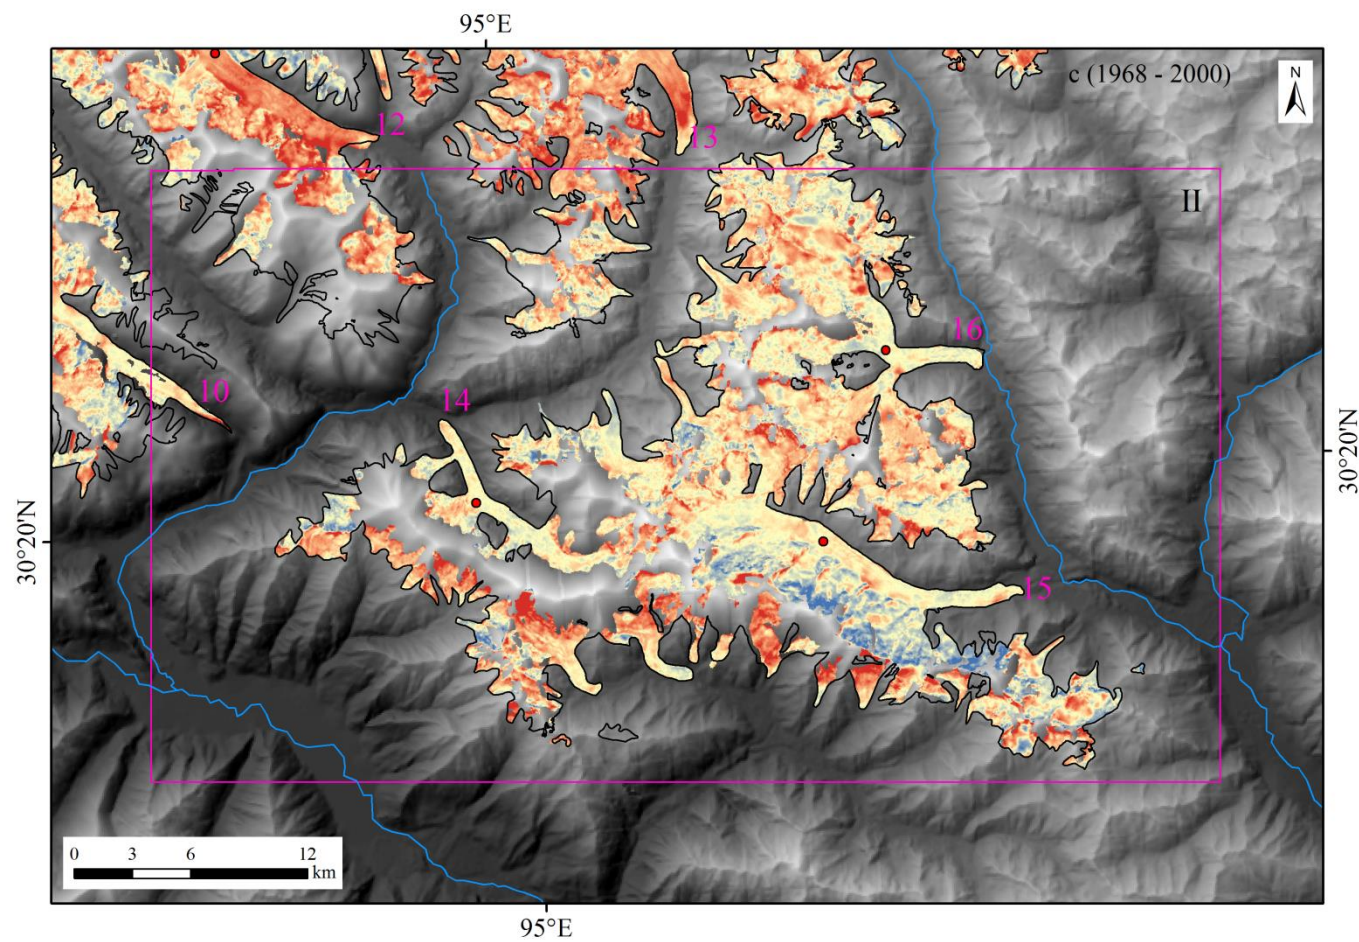

Supplementary Figure S4 Elevation changes in the CNR from 1968 to 2000. The glacier outlines are based on the geometric union of the 1968 and 2016 glacier extents. (a) Elevation change in the region I; (b) Elevation change in the region II; (c) Elevation change III.



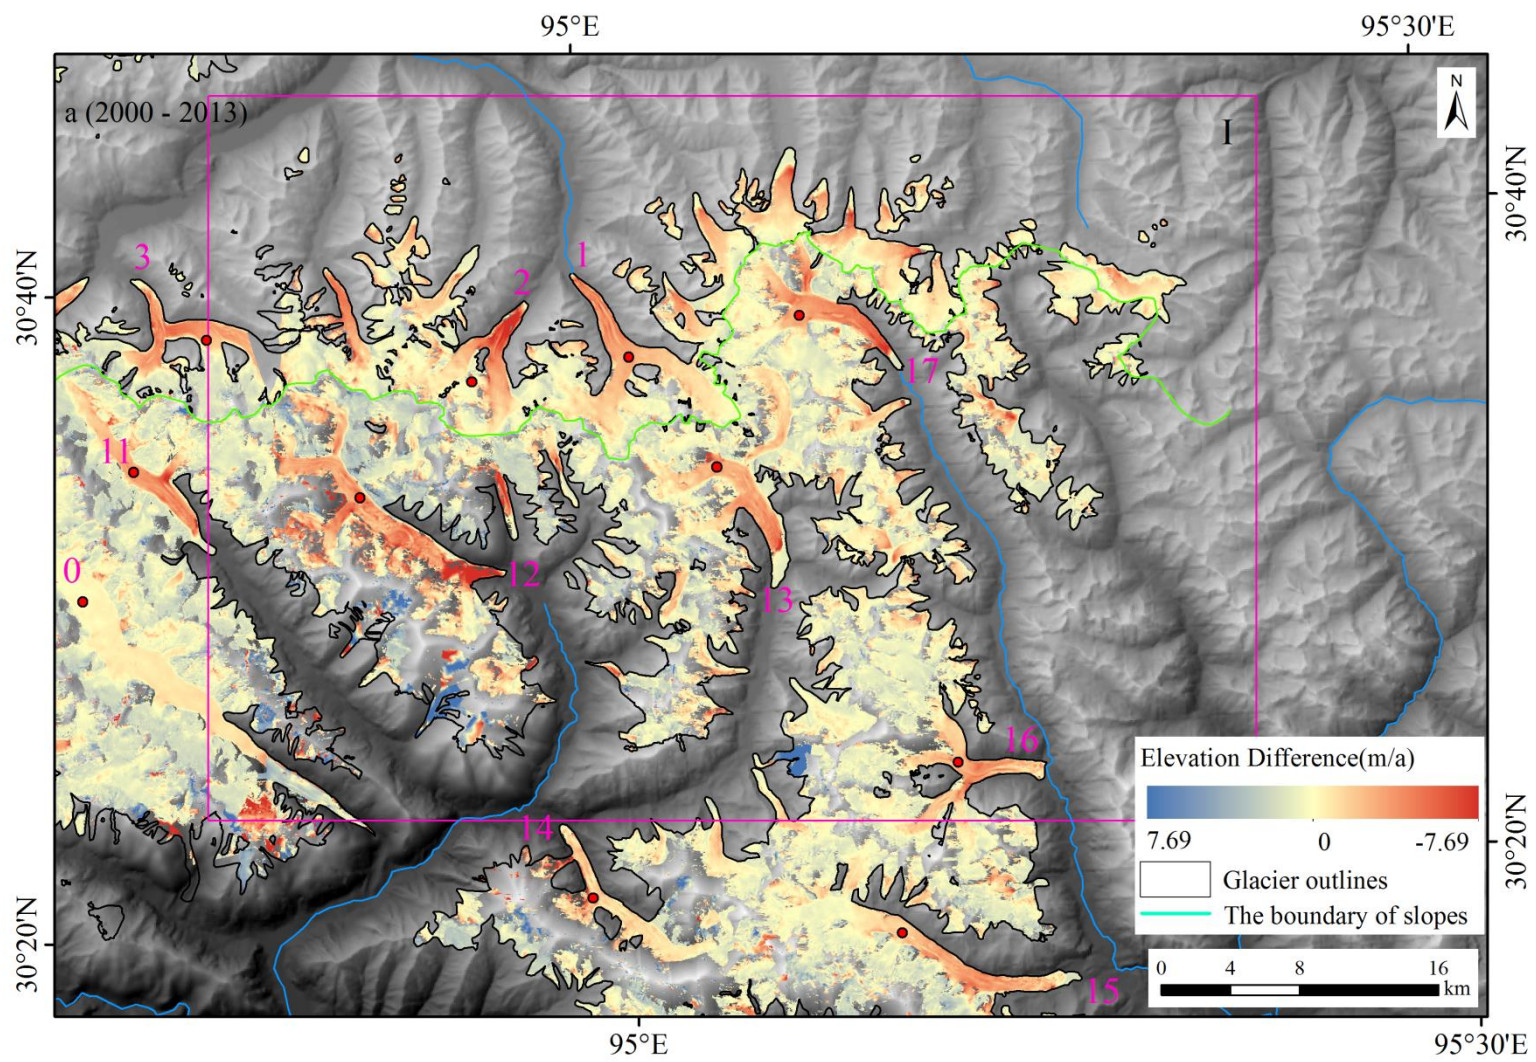

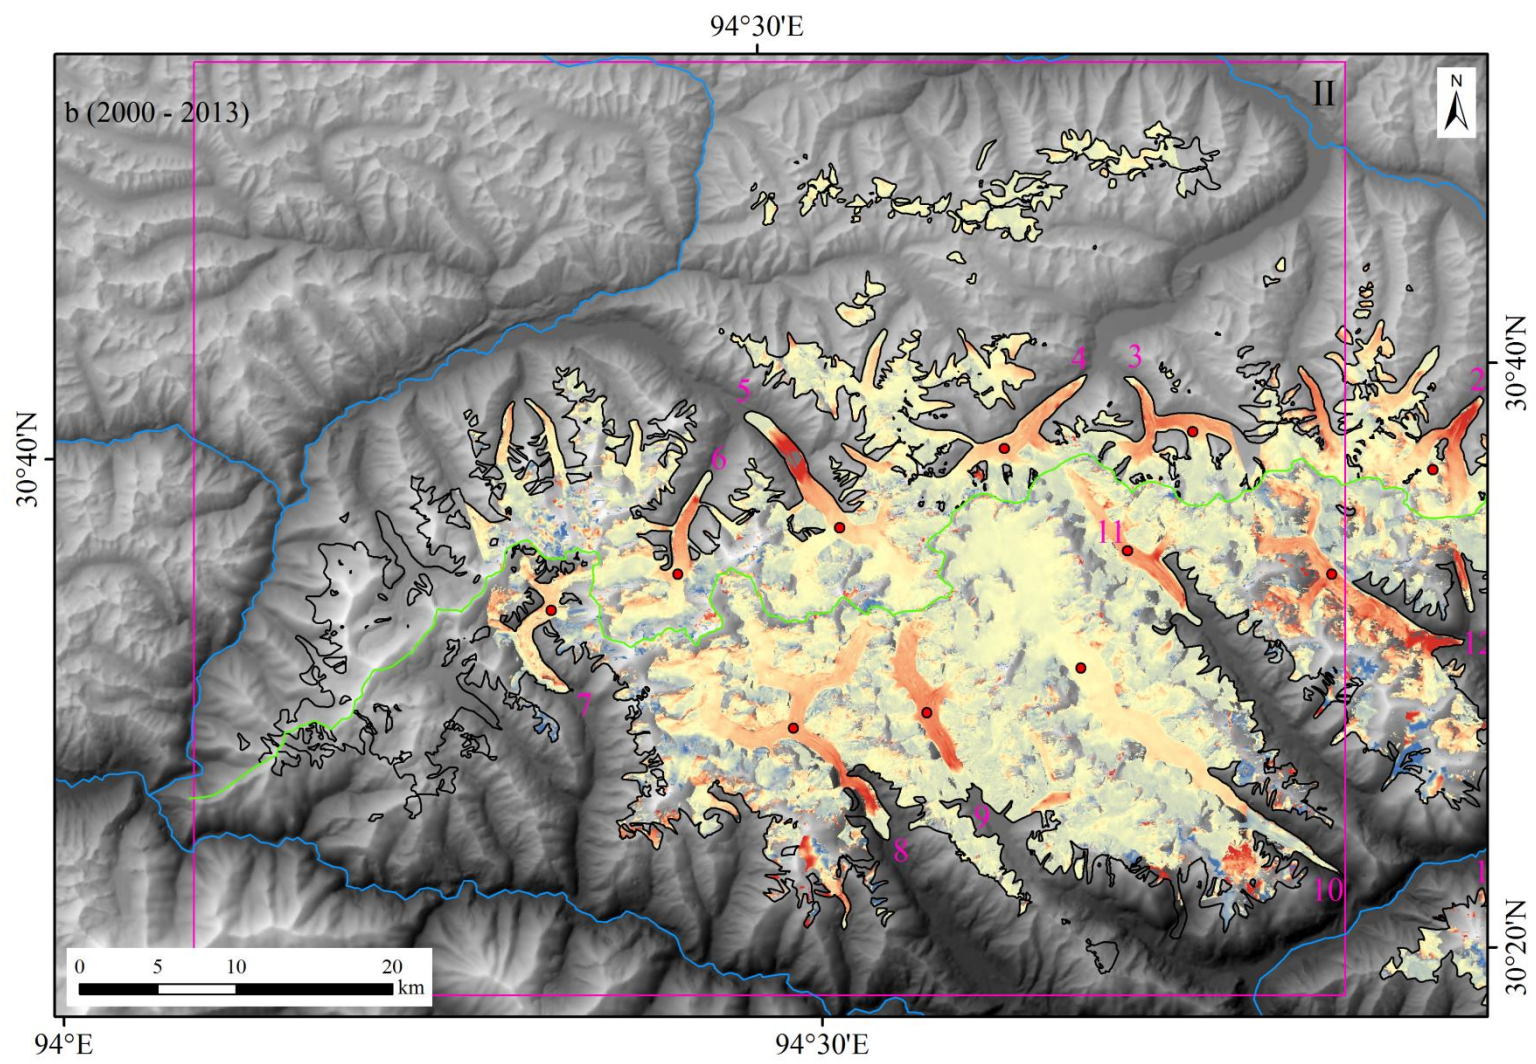



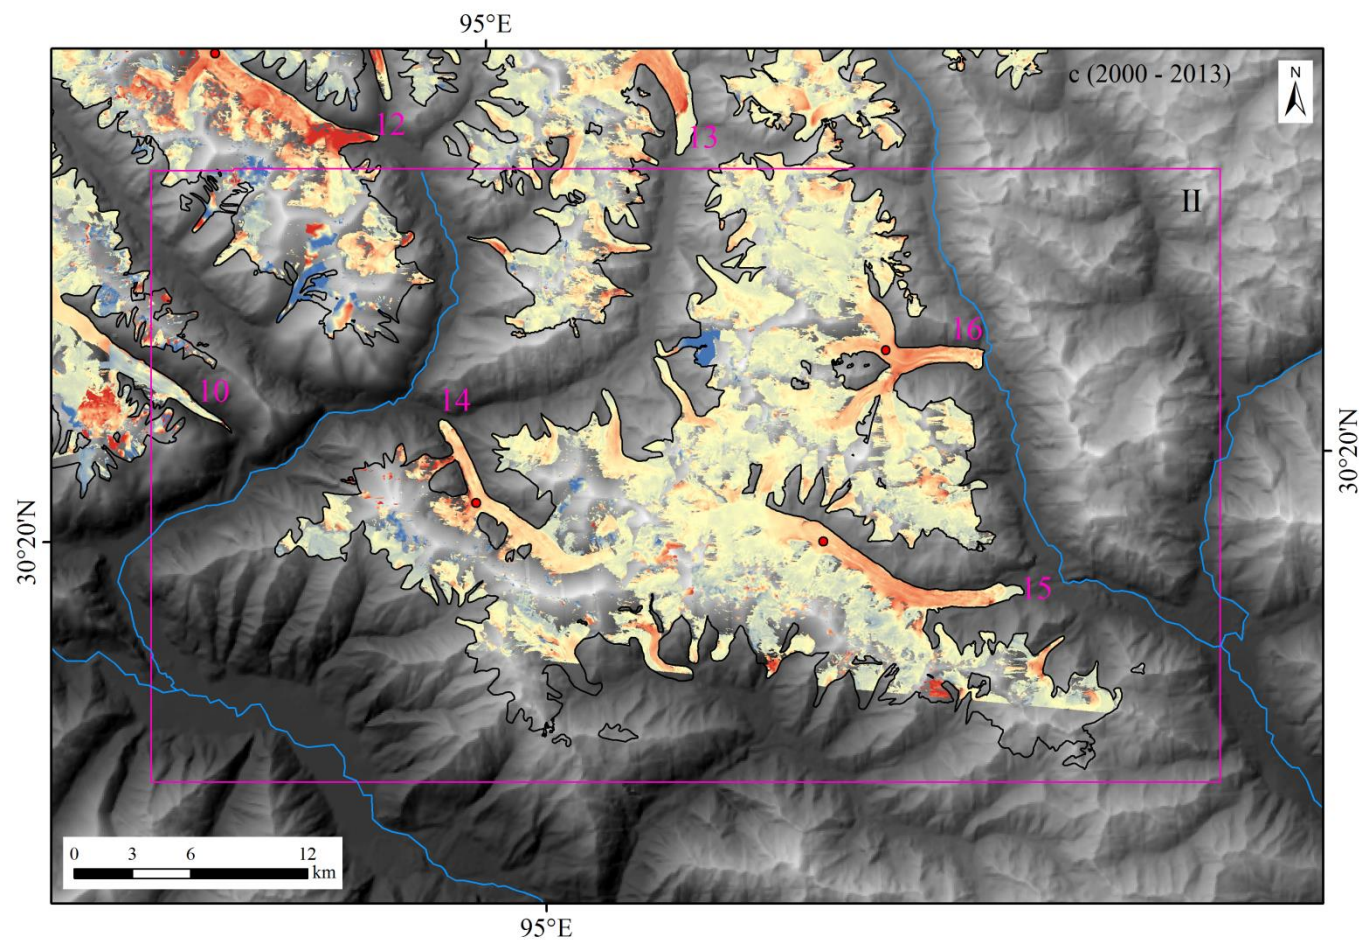

Supplementary Figure S5 Elevation changes in the CNR from 2000 to ~2013. The glacier outlines are based on the geometric union of the 1968 and 2016 glacier extents. (a) Elevation change in the region I; (b) Elevation change in the region II; (c) Elevation change III.

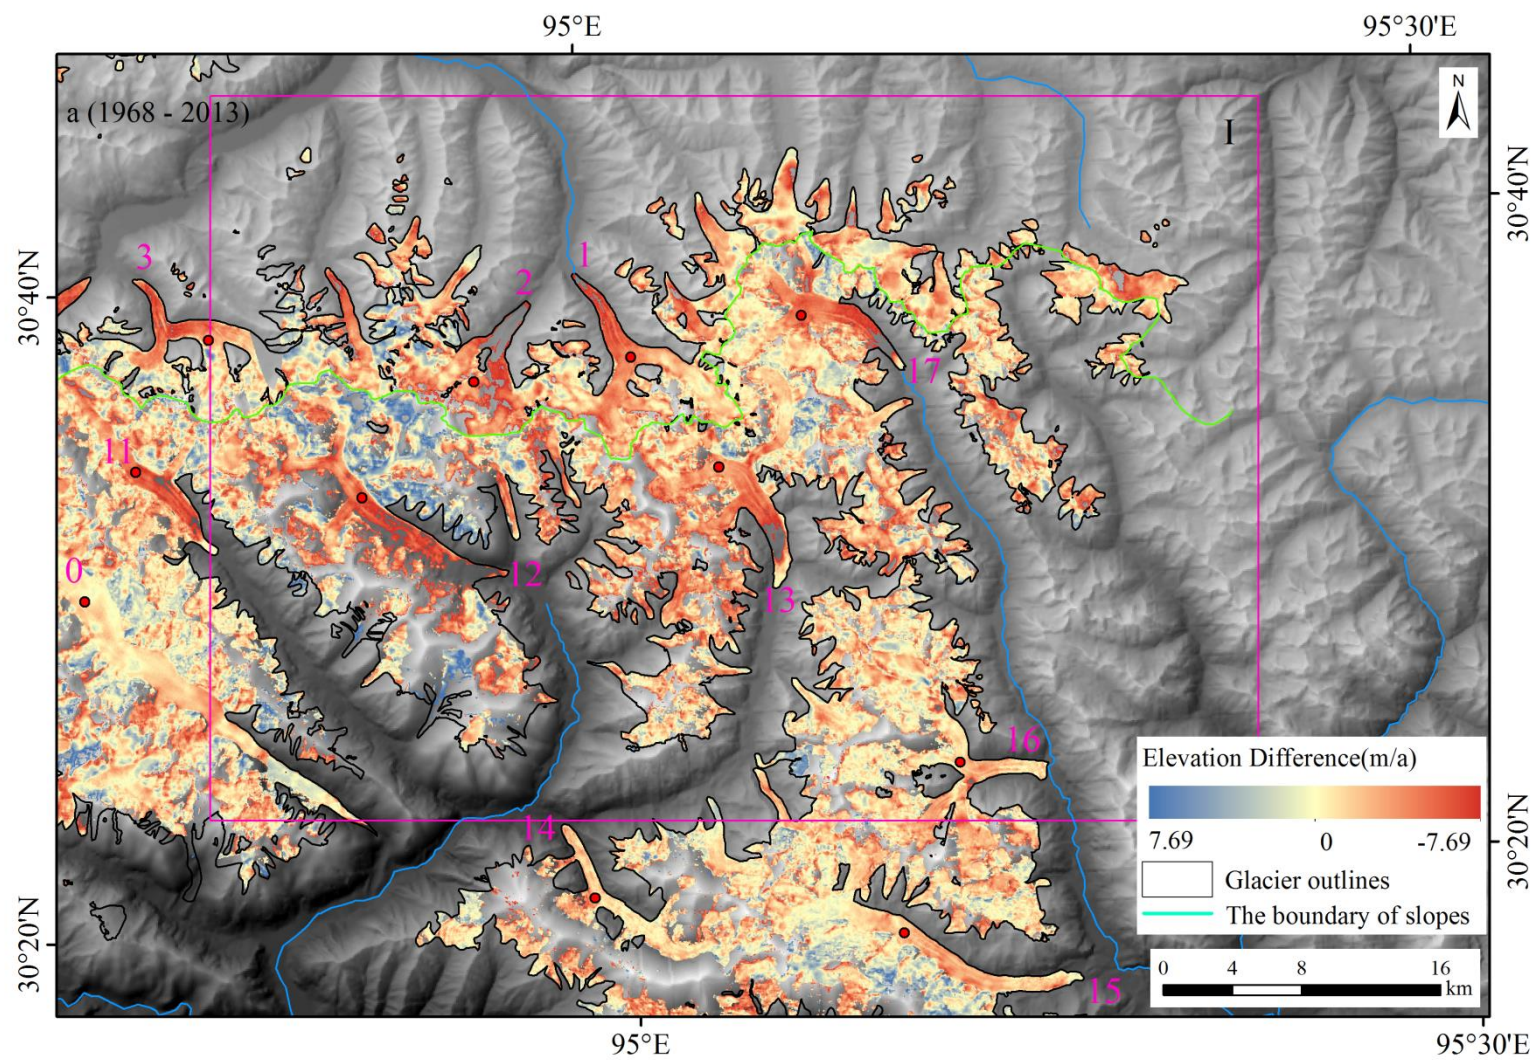



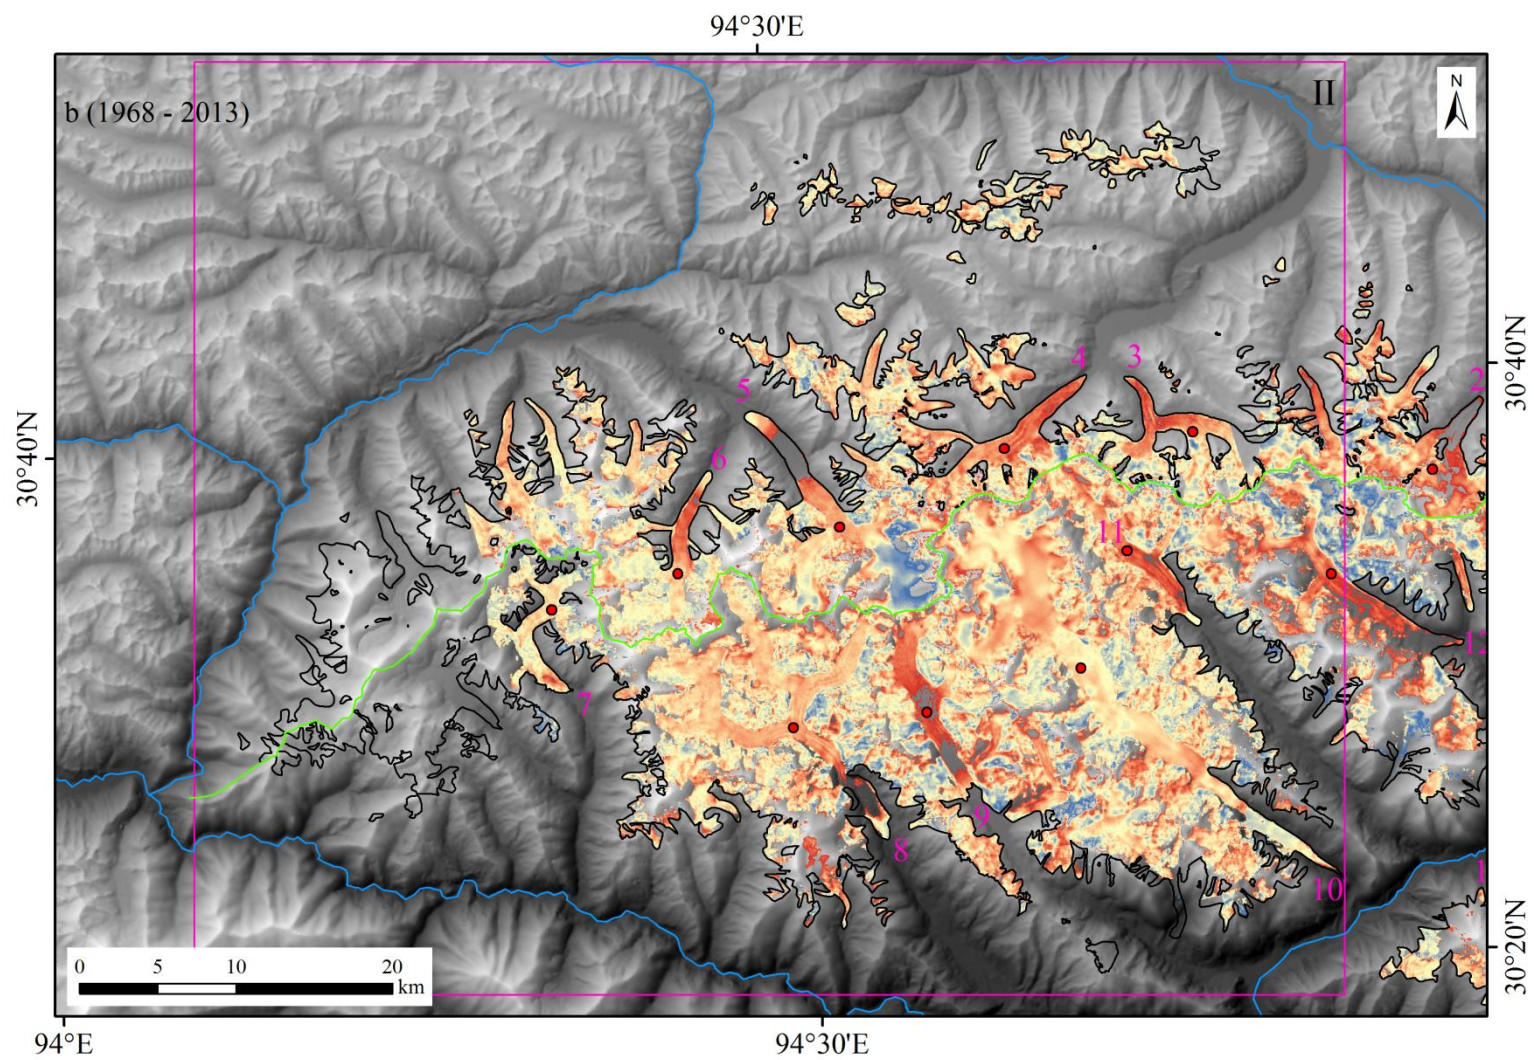

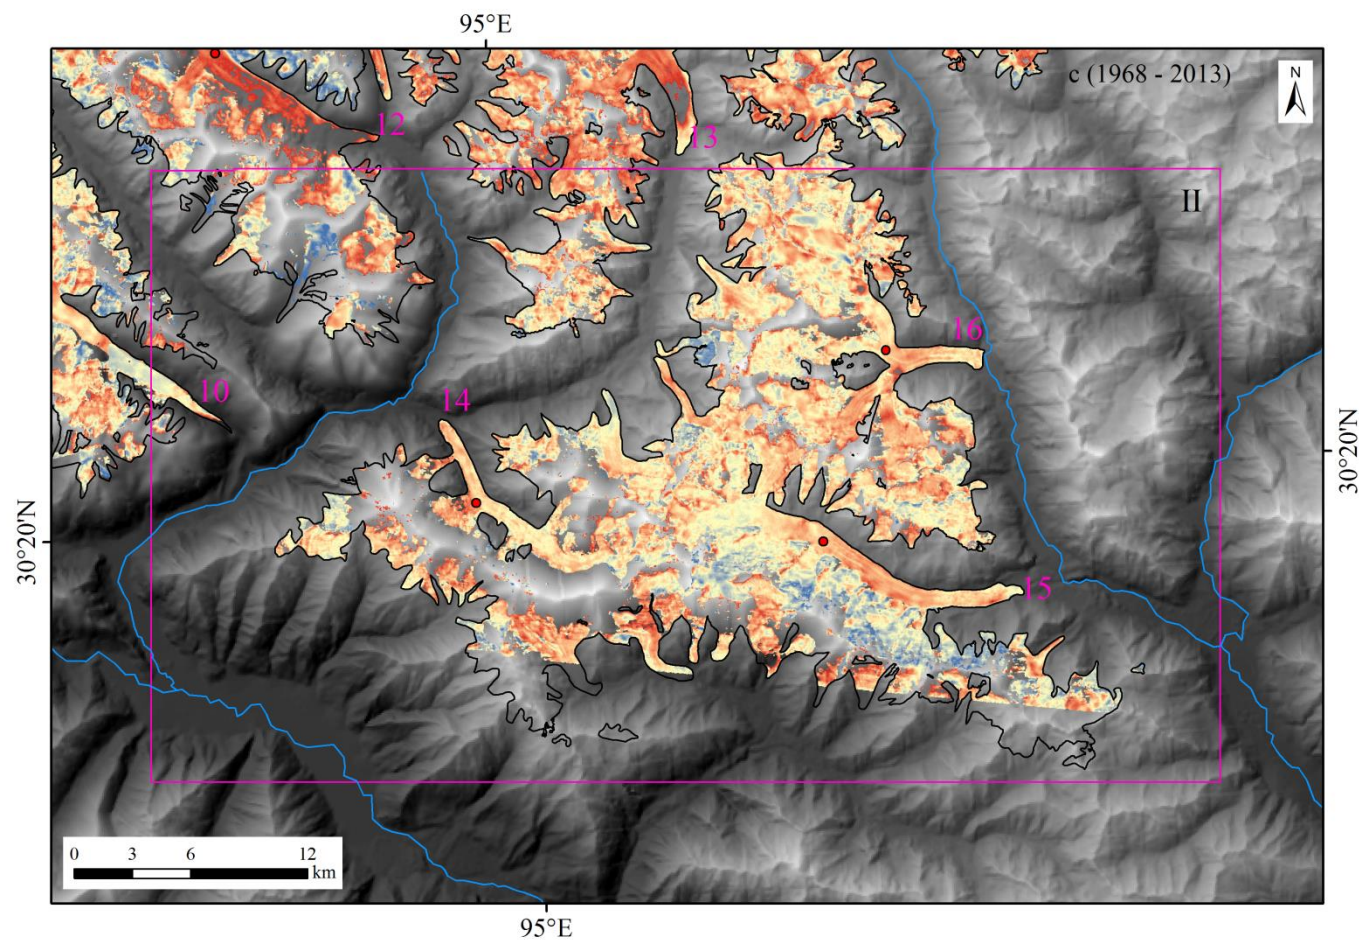

Supplementary Figure S6 Elevation changes in the CNR from 1968 to ~2013. The glacier outlines are based on the geometric union of the 1968 and 2016 glacier extents. (a) Elevation change in the region I; (b) Elevation change in the region II; (c) Elevation change III.



# Supplementary Tables

Supplementary Table S1 Length change of glaciers in the CNR. The uncertainties in glacier length in 1968 and 2016 are 6 and 7.5 m. The uncertainties in length change is 0.20 m a<sup>-1</sup> during 1968 to 2016.

| WGI ID     | 1968       |                           | 2016       |                           | Length change<br>(m a <sup>-1</sup> ) | Rise in<br>terminus<br>elevation (m) |
|------------|------------|---------------------------|------------|---------------------------|---------------------------------------|--------------------------------------|
|            | Length (m) | Terminus<br>elevation (m) | Length (m) | Terminus<br>elevation (m) |                                       |                                      |
| 5N225E0005 | 19465.11   | 4246                      | 19002.16   | 4293                      | -9.64                                 | 47                                   |
| 5N225E0010 | 14915.31   | 4337                      | 14010.08   | 4389                      | -18.86                                | 52                                   |
| 5N225E0012 | 5895.97    | 4740                      | 4226.54    | 4846                      | -34.78                                | 106                                  |
| 5N225E0014 | 3354.56    | 5054                      | 2791.55    | 5116                      | -11.73                                | 62                                   |
| 5N225E0018 | 5819.22    | 4795                      | 4587.67    | 4845                      | -25.66                                | 50                                   |
| 5N225E0022 | 5201.72    | 4848                      | 4164.37    | 4906                      | -21.61                                | 58                                   |
| 5N225E0033 | 12624.73   | 4184                      | 11642.76   | 4227                      | -20.46                                | 43                                   |
| 5N225E0034 | 3074.01    | 5012                      | 2457.07    | 5135                      | -12.85                                | 123                                  |
| 5N225E0036 | 2907.52    | 4685                      | 2600.69    | 4761                      | -6.39                                 | 76                                   |
| 5O281B0534 | 3355.81    | 4694                      | 2240.71    | 4792                      | -23.23                                | 98                                   |
| 5O281B0546 | 6083.60    | 4870                      | 5309.17    | 4909                      | -16.13                                | 39                                   |
| 5O281B0567 | 4742.23    | 4622                      | 4525.15    | 4672                      | -4.52                                 | 50                                   |
| 5O281B0575 | 24703.52   | 3915                      | 19657.25   | 4110                      | -105.13                               | 195                                  |
| 5O281B0583 | 10774.57   | 4094                      | 8506.80    | 4201                      | -47.25                                | 107                                  |
| 5O281B0596 | 6781.61    | 4590                      | 6501.30    | 4619                      | -5.84                                 | 29                                   |
| 5O281B0610 | 10804.78   | 4213                      | 9773.67    | 4379                      | -21.48                                | 166                                  |
| 5O281B0611 | 11068.81   | 4112                      | 10521.56   | 4195                      | -11.40                                | 83                                   |
| 5O281B0626 | 14162.98   | 4123                      | 12339.75   | 4336                      | -37.98                                | 213                                  |
| 5O281B0632 | 5734.49    | 4229                      | 4483.55    | 4450                      | -26.06                                | 221                                  |
| 5O281B0661 | 9636.27    | 3846                      | 7707.38    | 4037                      | -40.19                                | 191                                  |
| 5O281B0668 | 18706.15   | 3759                      | 18413.35   | 3782                      | -6.10                                 | 23                                   |
| 5O281B0702 | 43458.08   | 3179                      | 41656.85   | 3284                      | -37.53                                | 105                                  |
| 5O281B0729 | 34651.63   | 2738                      | 33993.28   | 2882                      | -13.72                                | 144                                  |
| 5O281B0746 | 13687.27   | 3624                      | 11756.18   | 3705                      | -40.23                                | 81                                   |
| 5O281B0755 | 5487.93    | 3981                      | 4332.47    | 4304                      | -24.07                                | 323                                  |
| 5O281B0768 | 18371.37   | 3466                      | 17789.97   | 3522                      | -12.11                                | 56                                   |
| 5O281B0804 | 5312.66    | 3562                      | 4250.48    | 3810                      | -22.13                                | 248                                  |
| 5O281B0813 | 24408.54   | 3989                      | 22164.38   | 4118                      | -46.75                                | 129                                  |
| 5O281B0818 | 3323.90    | 4744                      | 2461.76    | 4886                      | -17.96                                | 142                                  |
| 5O281B0836 | 5143.41    | 4434                      | 4331.54    | 4601                      | -16.91                                | 167                                  |
| 5O282A0071 | 19662.20   | 3381                      | 18471.66   | 3474                      | -24.80                                | 93                                   |
| 5O282A0101 | 5840.49    | 4230                      | 5277.31    | 4355                      | -11.73                                | 125                                  |
| 5O282A0103 | 11395.90   | 4276                      | 9871.65    | 4350                      | -31.76                                | 74                                   |
